# Supplementary material for: Streptococcus pneumoniae metal homeostasis alters cellular metabolism
Source: Royal Society of Chemistry journal article supplement (doi:10.1039/d0mt00118j), 2020-07-17
Supplement: d0mt00118j1.pdf [file d0mt00118j1.pdf]

## Supplemental Information

### Supplemental Figure 1. Antibiotic sensitivity in T4R and $\Delta 1434-8$

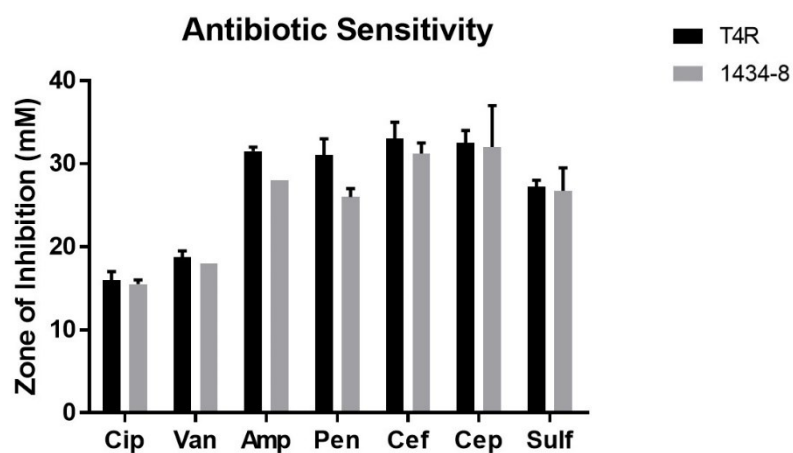

### Supplemental Figure 2. *SP1433* specifically regulates *SP1434-8* and not characterized

A

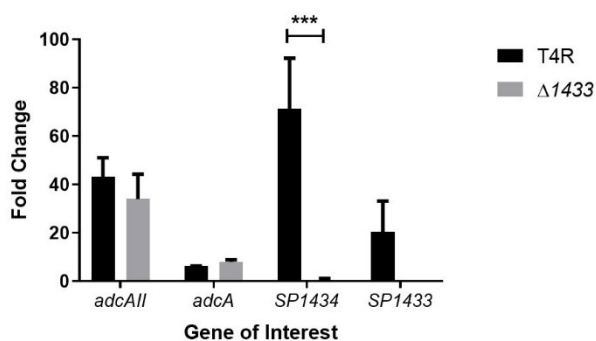

B

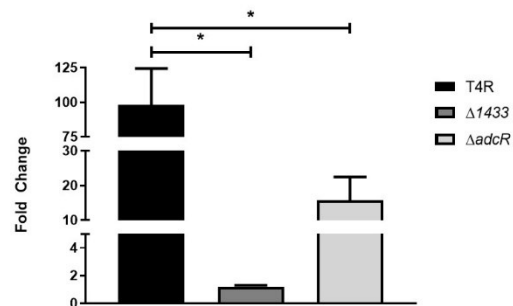

zinc importers

Supplemental Figure 3. Heatmap of metabolite concentrations across pneumococcal growth phases

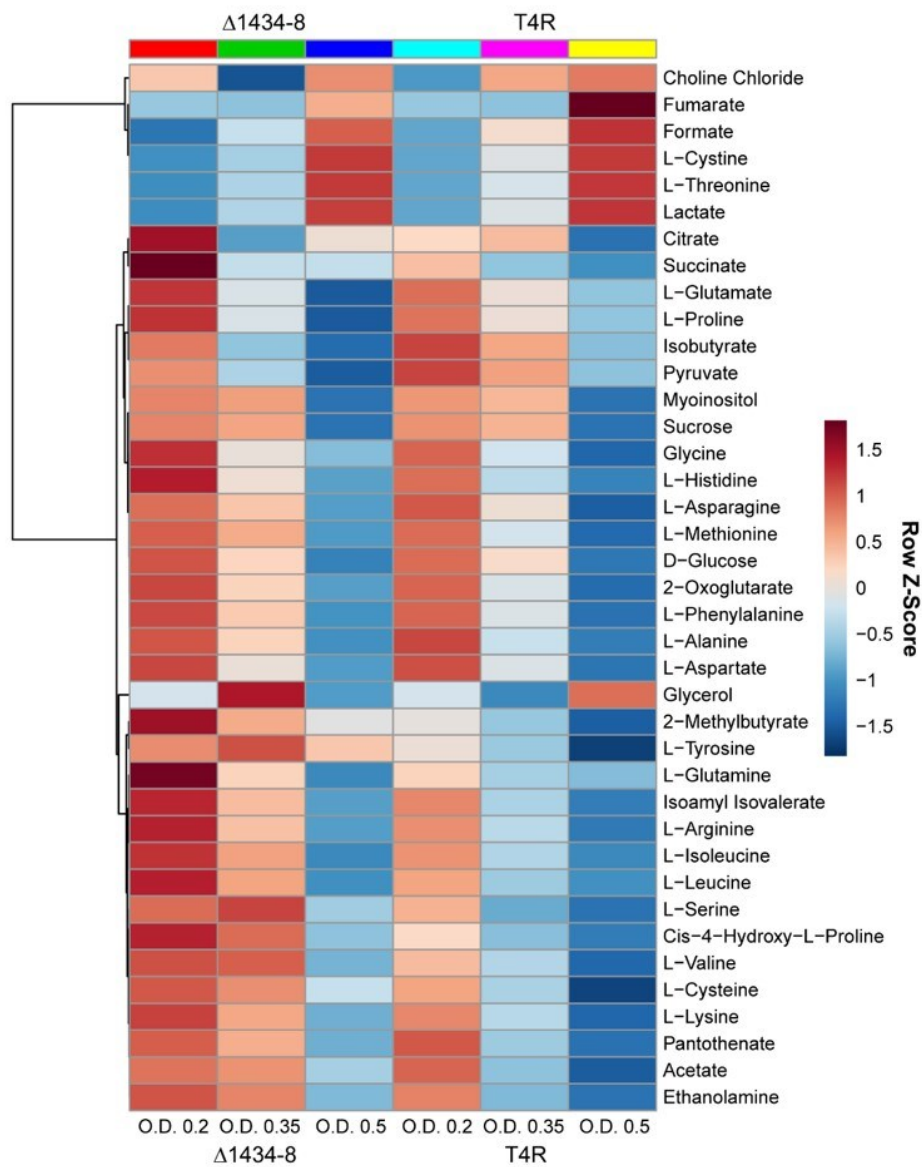

**Supplemental Table 1. Microarray data from TIGR4 following TPEN treatment**

| Gene Name | Predicted Gene Function                                   | Fold Change |
|-----------|-----------------------------------------------------------|-------------|
| SP1435    | ABC transporter, ATP-binding protein                      | 4.201       |
| SP1173    | conserved hypothetical protein                            | 3.626       |
| SP1436    | hypothetical protein                                      | 3.382       |
| SP1434    | ABC transporter, ATP-binding-permease                     | 3.241       |
| SP0052    | hypothetical protein                                      | 3.156       |
| SP1002    | adhesion lipoprotein ( <i>adcAII</i> )                    | 3.125       |
| SP1003    | conserved hypothetical protein ( <i>phtD</i> )            | 2.993       |
| SP2171    | zinc ABC transporter, ATP-binding protein ( <i>adcc</i> ) | 2.943       |
| SP0641    | serine protease, subtilase family                         | 2.523       |
| SP1437    | conserved domain protein                                  | 2.298       |
| SP1472    | oxidoreductase, putative                                  | 2.233       |
| SP2172    | adc operon repressor ( <i>adcr</i> )                      | 2.209       |
| SP0053    | phosphoribosylaminoimidazole carboxylase                  | 2.111       |
| SP0117    | pneumococcal surface protein A ( <i>pspA</i> )            | 1.955       |
| SP0327    | hypothetical protein, interruption                        | 1.832       |
| SP2206    | ribosomal subunit interface protein                       | 1.716       |
| SP1470    | thiamine biosynthesis protein ( <i>apbE</i> )             | 1.67        |
| SP1471    | oxidoreductase, putative                                  | 1.66        |
| SP1438    | ABC transporter, ATP-binding protein                      | 1.629       |
| SP1690    | ABC transporter, substrate-binding protein                | 1.605       |
| SP1647    | Endopeptidase O                                           | 1.514       |
| SP1215    | Putative FNT family transporter                           | 1.512       |
| SP0534    | Hypothetical protein                                      | 1.501       |

**Supplemental Table 2. BLAST analysis of the SP1433-1438 operon**

| Gene Name | Uniprot ID-Description                                      | Protein length | Protein domains (Position)                                                              | Protein COG                                        | Top BLASTp Alignment                              | Protein length (% Ident) | Query Cover | E value |
|-----------|-------------------------------------------------------------|----------------|-----------------------------------------------------------------------------------------|----------------------------------------------------|---------------------------------------------------|--------------------------|-------------|---------|
| SP1433    | A0A0H2UQW4<br>Transcriptional regulator, AraC family        | 330 AA         | Helix-turn-helix DNA-binding (219-317)                                                  | Transcription                                      | SoxS regulatory protein                           | 330 AA (99.70%)          | 100%        | 0.0     |
| SP1434    | A0A0H2UQM1<br>ABC transporter, ATP-binding/permease protein | 586 AA         | Transmembrane (21-41, 61-86, 147-175, 246-276, 274-298)<br>Nucleotide binding (370-377) | Defense mechanisms                                 | IrtA: iron transport ATP-binding/permease protein | 584 AA (99.83%)          | 99%         | 0.0     |
| SP1435    | A0A0H2UQM0<br>ABC transporter, ATP-binding protein          | 581 AA         | Transmembrane (32-52, 64-81, 145-161, 167-184, 248-274)<br>Nucleotide binding (371-378) | Defense mechanisms                                 | NvdA: $\beta$ -1,2 glucan export                  | 573 AA (99.65%)          | 100%        | 0.0     |
| SP1436    | A0A0H2UQL1<br>Uncharacterized protein                       | 209 AA         | Transmembrane (12-33, 39-57, 64-97, 113-133, 163-184, 190-208)                          | Function unknown                                   | Conserved hypothetical integral membrane protein  | 194 AA (100.00%)         | 100%        | 1e-127  |
| SP1437    | A0A0H2UQT8<br>Conserved domain protein                      | 147 AA         | Signal peptide (1-18)<br>Transmembrane (126-146)                                        | Inorganic ion transport & metabolism               | Putative HMP/thiamine permease protein            | 231 AA (96.22%)          | 88%         | 1e-118  |
| SP1438    | A0A0H2UQX0ABC<br>transporter, ATP-binding protein           | 374 AA         | Nucleotide binding (34-41)<br>ABC transporter (2-239)                                   | Inorganic ion, carbohydrate transport & metabolism | Ribose ABC transporter ATP-binding protein        | 454 AA (99.73%)          | 100%        | 0.0     |

**Supplemental Table 3. Intracellular metal ion concentrations in ppb (µg/L)**

|                                | Mn55           | Fe56            | Ni60          | Cu63           | Zn66            | Cd112          |
|--------------------------------|----------------|-----------------|---------------|----------------|-----------------|----------------|
| <b>T4R</b>                     | 0.27 (± 0.003) | 73.03 (± 3.10)  | 2.71 (± 0.87) | 59.29 (± 1.33) | 78.91(± 3.47)   | 0.07 (± 0.007) |
| <b>Δ1434-8</b>                 | 0.29 (± 0.004) | 38.20 (± 7.25)  | 0.78 (± 0.26) | 61.73 (± 3.47) | 160.0 (± 26.37) | 0.08 (± 0.01)  |
| <b>T4R + 20 µM TPEN</b>        | 0.12 (± 0.002) | 87.24 (± 22.53) | 1.04 (± 0.32) | 40.27 (± 1.42) | 54.18 (± 2.67)  | 0.05 (± 0.01)  |
| <b>Δ1434-8 + 20 µM TPEN</b>    | 0.12 (± 0.001) | 85.40 (± 20.66) | 2.48 (± 0.52) | 34.58 (± 1.25) | 63.42 (± 4.80)  | 0.09 (± 0.02)  |
| <b>P value C+Y Medium</b>      | ** 0.009       | ** 0.007        | 0.355         | 0.562          | * 0.030         | 0.562          |
| <b>P value C+Y +20 µM TPEN</b> | 0.525          | 0.953           | 0.126         | * 0.049        | 0.377           | 0.388          |

| Primer Name    | Sequence 5'→3'                                                                |
|----------------|-------------------------------------------------------------------------------|
| SP1433 Forward | CAA CCT TGC TTC AAC CGA ATC                                                   |
| SP1433 Reverse | CAG GAG CGT CCA TCT TAC AAT                                                   |
| SP1434 Forward | TAC GCA CTT GTC GGT TCA TC                                                    |
| SP1434 Reverse | CAC TTA TTG CTA TCC CGC CTA TC                                                |
| SP1435 Forward | CAA GAT TTA CAA GAA GGC GAT GAC                                               |
| SP1435 Reverse | GCG TCT TTA TTG TAG GCA AAC TC                                                |
| SP1436 Forward | TCC TGC AAC TAT GGC TAA TAC TG                                                |
| SP1436 Reverse | TCC TGC AAC TAT GGC TAA TAC TG                                                |
| SP1437 Forward | CTC GGA TGT AGG CGC AAT AA                                                    |
| SP1437 Reverse | TTA AGC CTC CCA CAA TAA GTC C                                                 |
| SP1438 Forward | TGG ACA TAG TTG ACC GTG TAT TT                                                |
| SP1438 Reverse | CTC GTC CGT TGG ATC CTA TTA TG                                                |
| SP1434-8 ko1   | AAT TAC TAT ACT TAT CCA TTC ATT TGC CTT                                       |
| SP1434-8 ko2   | TCT AAG TCT TAT TTC CCC ATA TAC TGT                                           |
| SP1434-8 ko3   | TCG CTT TTG TAA ATT TGG GCA TAA TAG                                           |
| SP1434-8 ko4   | AGC TGT CTG CCT CTT CAG AAC AAT AAC GA                                        |
| SP1433 ko1     | AGT TTC AGC ACT TAG TTT AGA TAG GGA                                           |
| SP1433 ko2     | TAA AAA TAT CTC TTG CCA GTC ACG CAT AAC ACA CTA TCC CTT TTA GAC AAT ATT CC    |
| SP1433 ko3     | GTA ATC AGA TTT TAG AAA ACA ATA AAC CCA GTA ATT TTT TAC AAG CCA TGT TTT TAT A |
| SP1433 ko4     | ACA TTT TCA AAA AAA ACC GAT ACC                                               |

**Supplemental Table 4. Primer sequences used in this study**
